# Supplementary figures and images for: TMEM16B regulates anxiety-related behavior and GABAergic neuronal signaling in the central lateral amygdala
Source: eLife journal article supplement (doi:10.7554/elife.47106), 2019-09-04

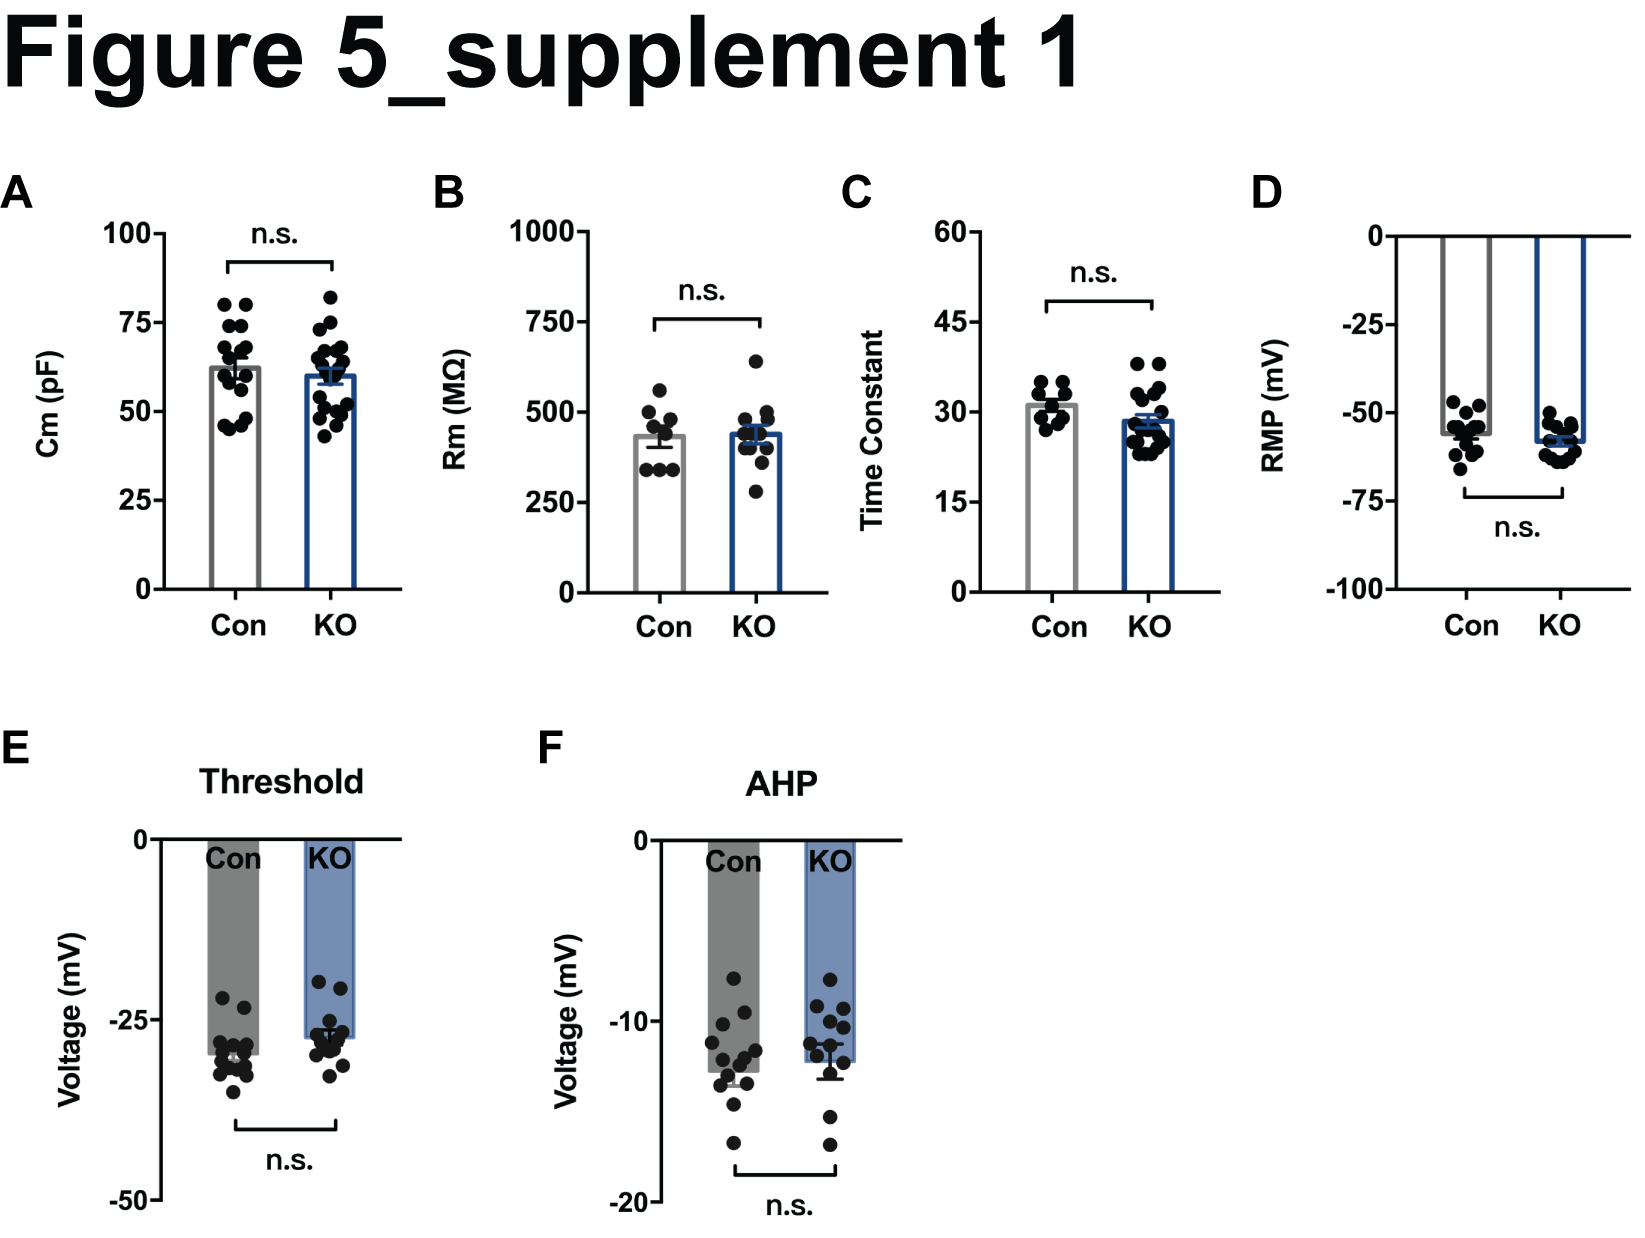

Supplement: supp [file elife-47106-supp-v1.zip › elife_poa_e47106_Figure_5_figure_supplement_1.tif]

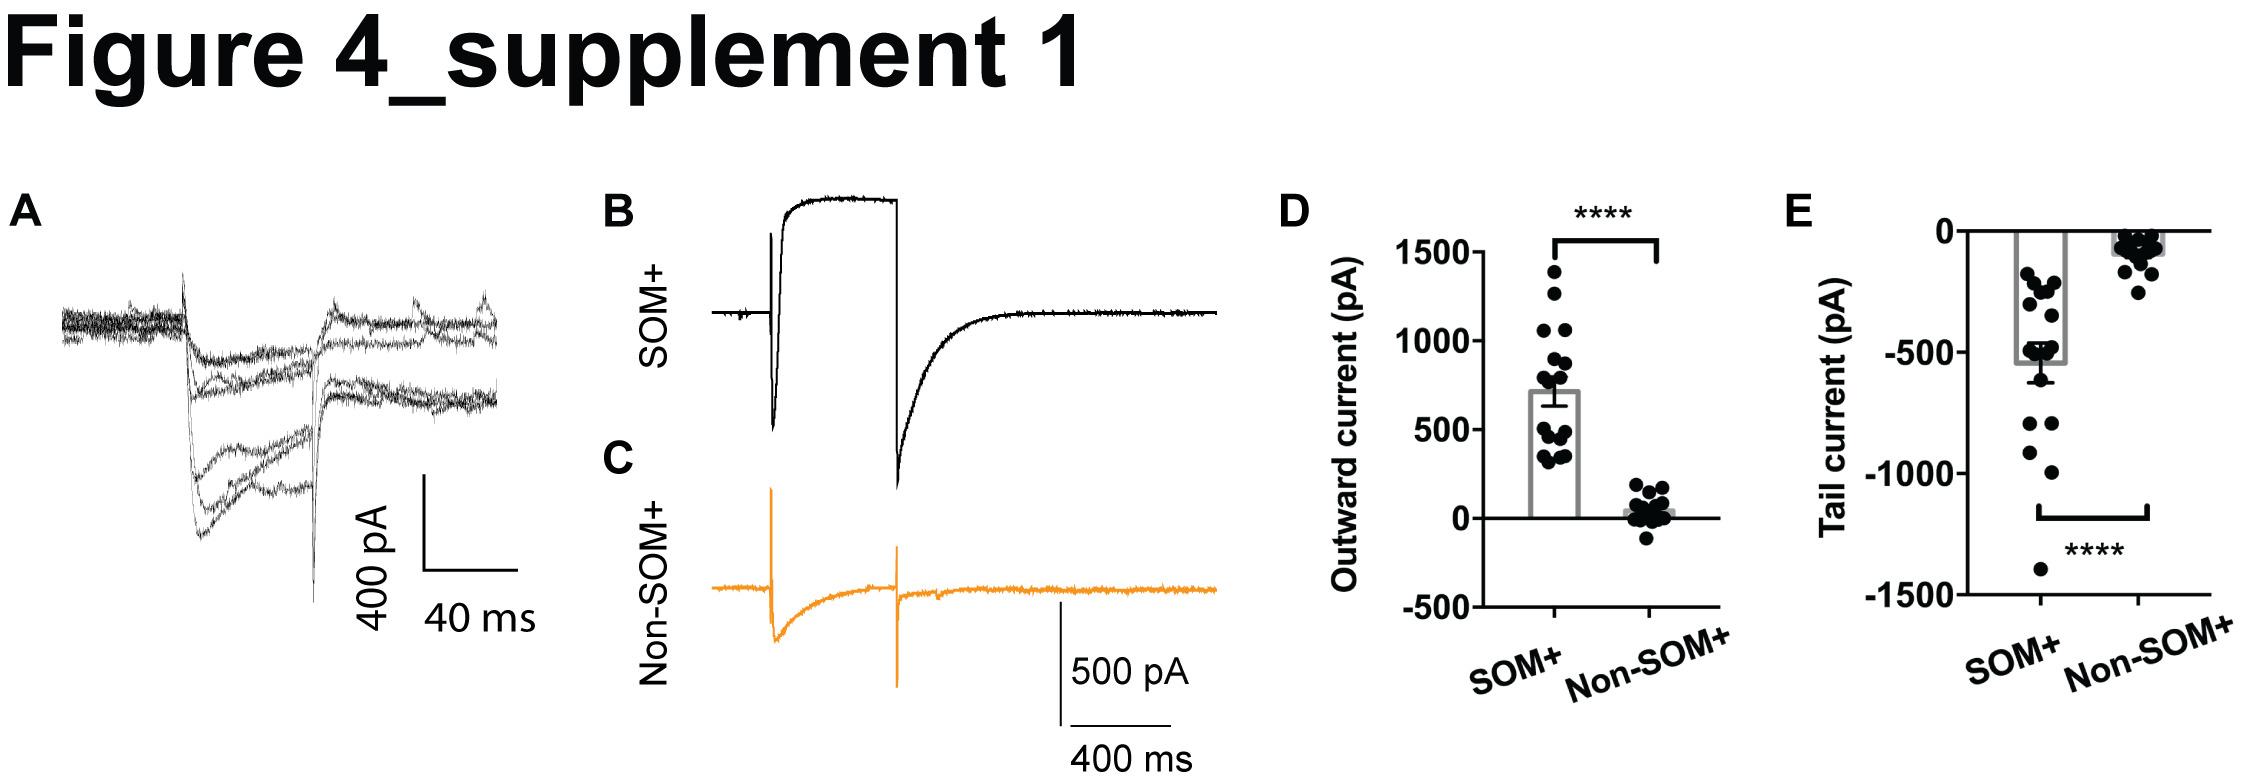

Supplement: supp [file elife-47106-supp-v1.zip › elife_poa_e47106_Figure_4_figure_supplement_1.tif]

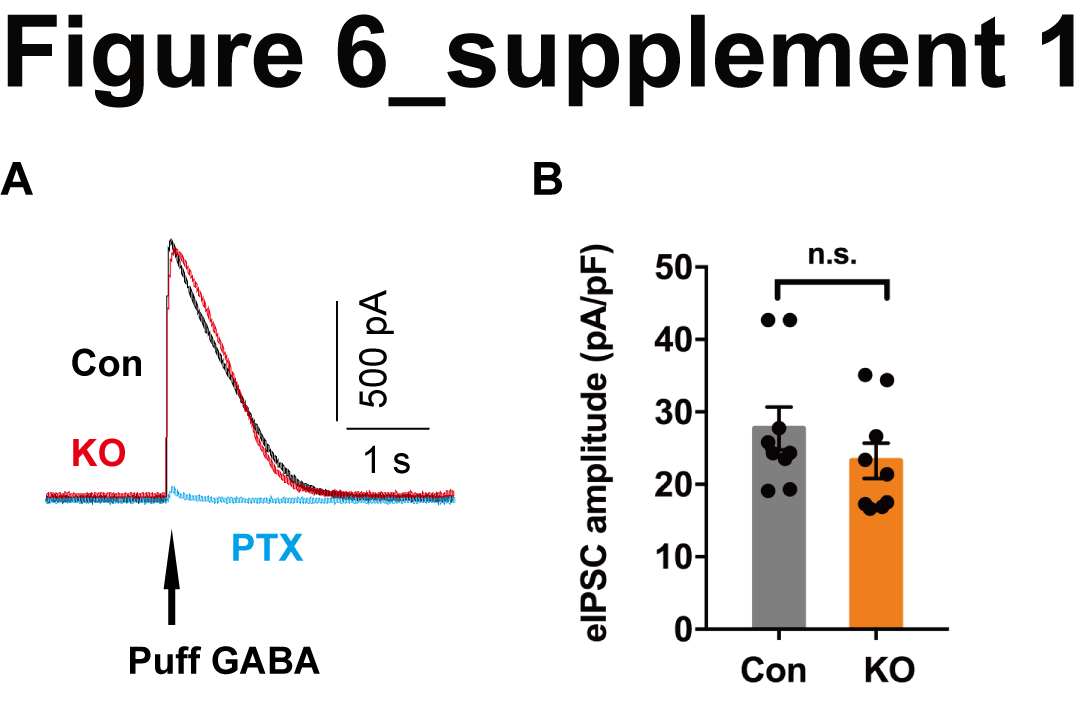

Supplement: supp [file elife-47106-supp-v1.zip › elife_poa_e47106_Figure_6_figure_supplement_1.tif]

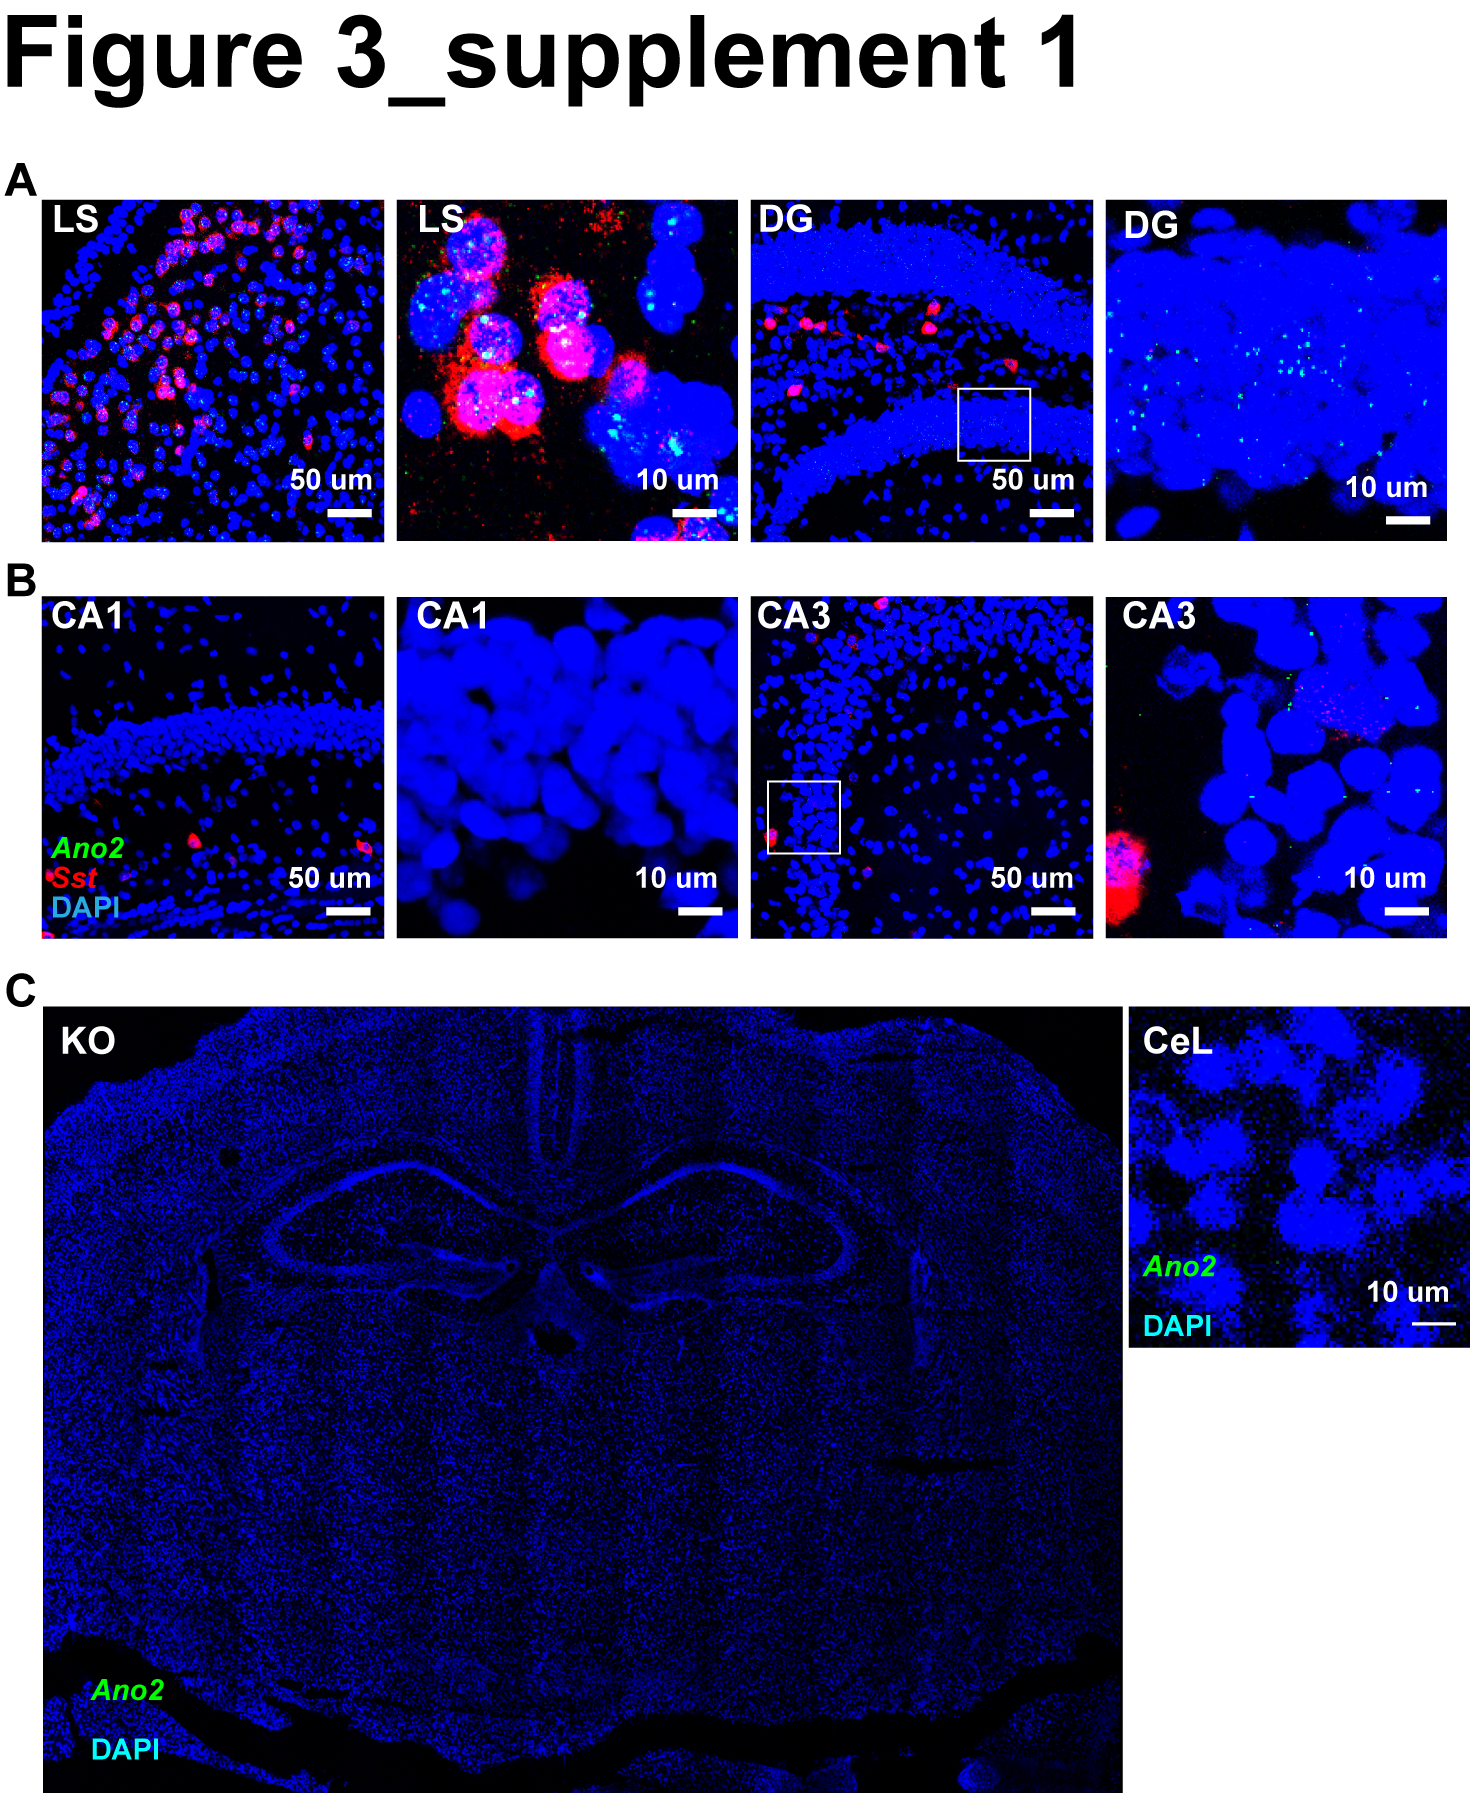

Supplement: supp [file elife-47106-supp-v1.zip › elife_poa_e47106_Figure_3_figure_supplement_1.tif]
